# Supplementary figures and images for: Appetite controlled by a cholecystokinin nucleus of the solitary tract to hypothalamus neurocircuit
Source: eLife journal article supplement (doi:10.7554/elife.12225), 2016-03-14

**A**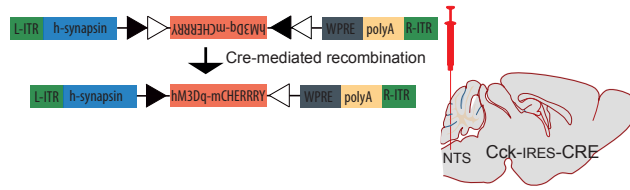**B**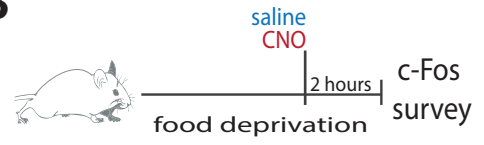**C**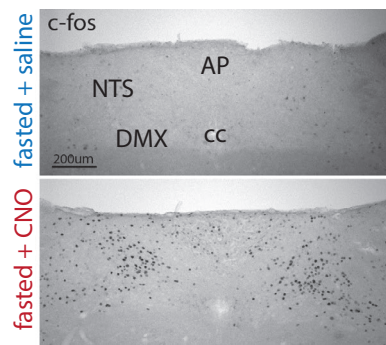**D**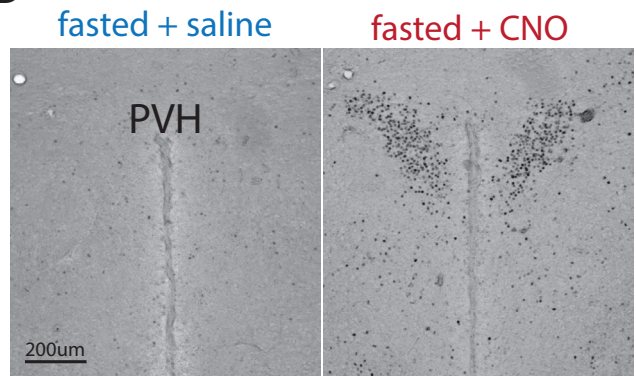

Supplement: supp [file elife-12225-supp-v1.zip]

**A**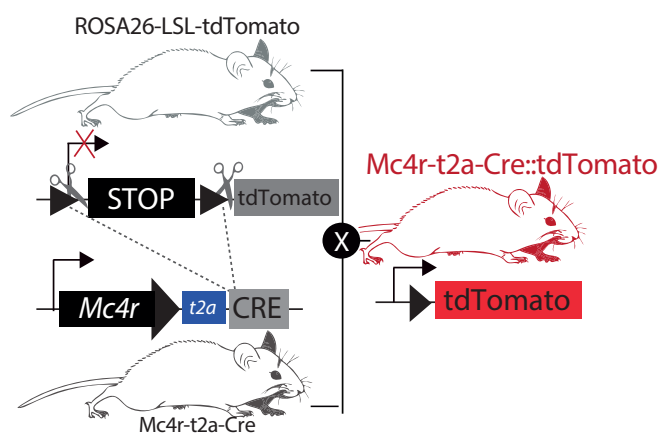**B**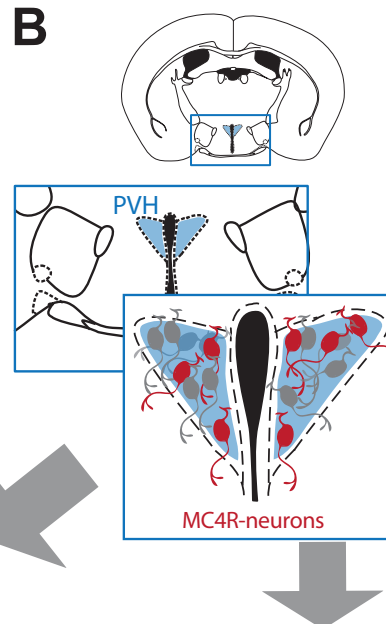**C**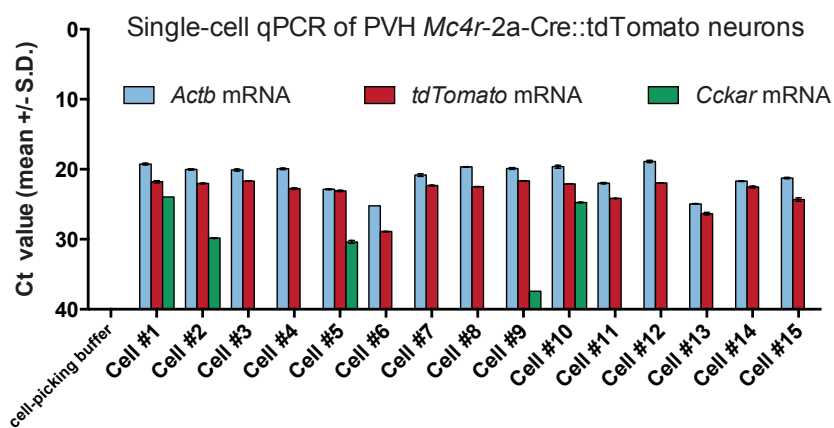**D**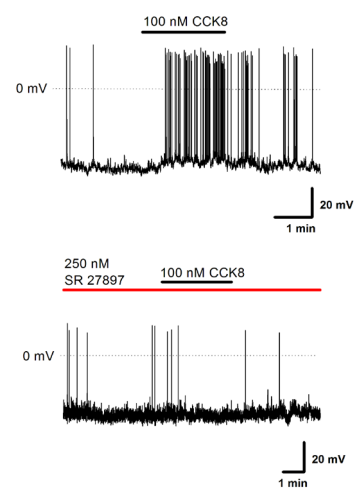

Supplement: supp [file elife-12225-supp-v1.zip]

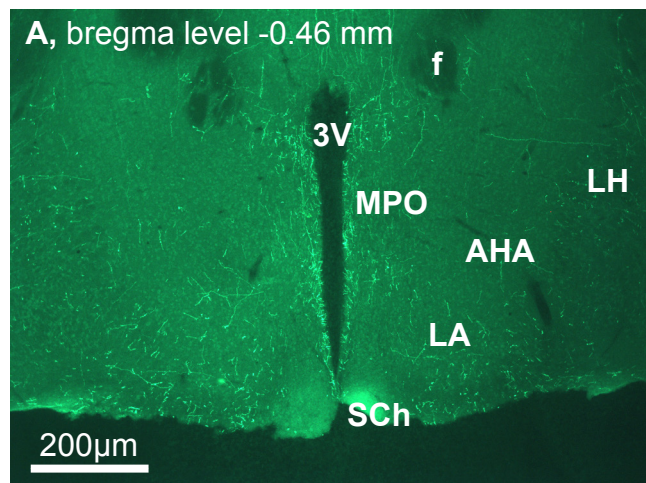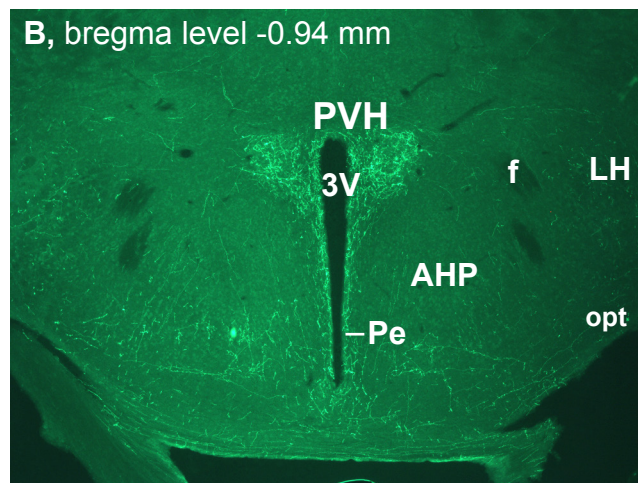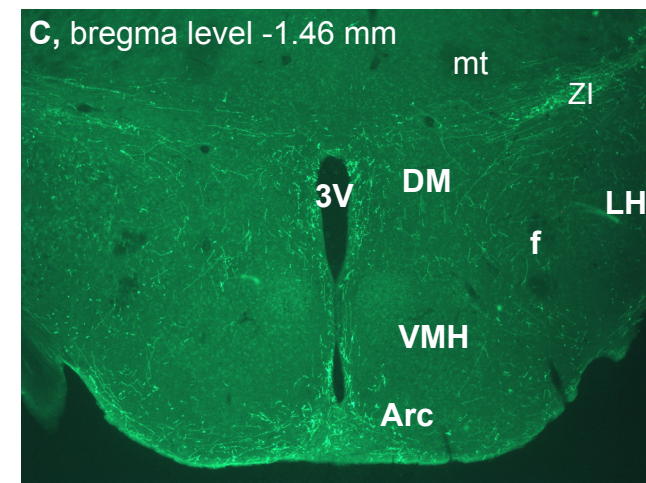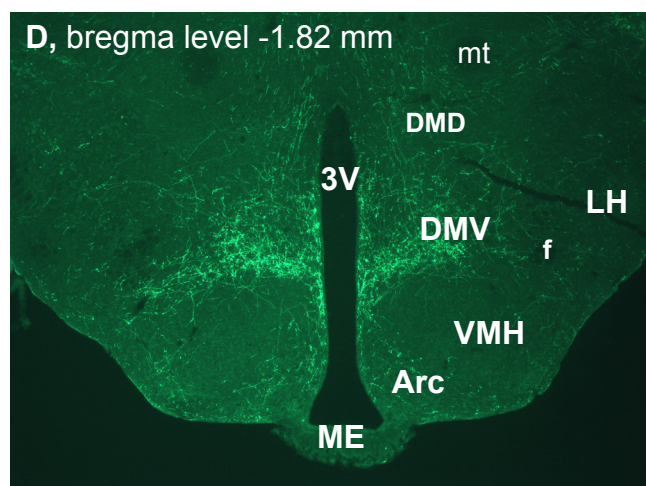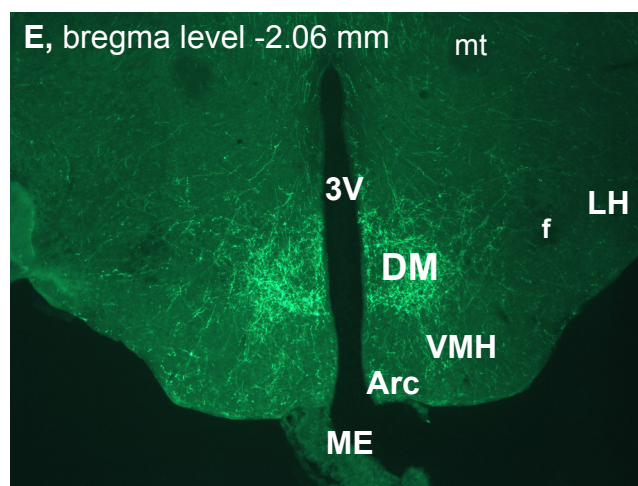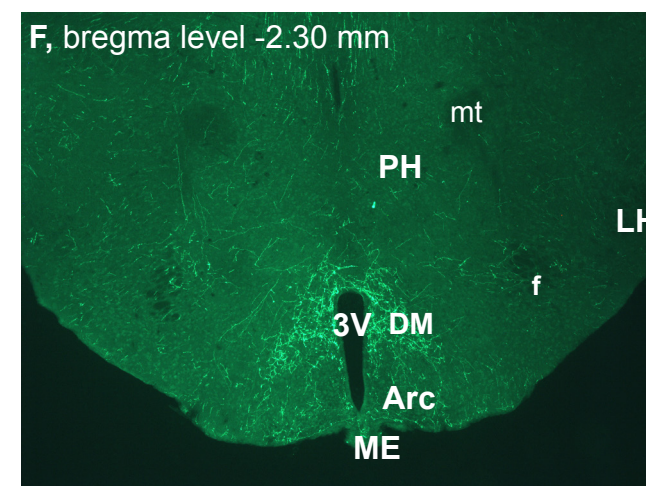

Supplement: supp [file elife-12225-supp-v1.zip]
